# Supplementary material for: Enabling a universal lateral flow readout for DNA strand displacement via disassembling chemical labels
Source: Royal Society of Chemistry journal article supplement (doi:10.1039/d3cc01743e), 2023-01-01
Supplement: d3cc01743e1.pdf [file d3cc01743e1.pdf]

## Supporting Information

### Enabling lateral flow readout for DNA strand displacement by disassembling chemical labels

Wanting Peng,<sup>a,#</sup> Yun Tan,<sup>a,#</sup> Chenlan Shen,<sup>b</sup> Yanan Tang,<sup>a,\*</sup> Feng Li<sup>a,b,\*</sup>

<sup>a</sup>Key Laboratory of Green Chemistry & Technology of Ministry of Education, College of Chemistry, Analytical & Testing Center, Sichuan University, 29 Wangjiang Road, Chengdu, Sichuan, P. R. China, 610064.

<sup>b</sup>Department of Laboratory Medicine, Med+X Center for Manufacturing, West China Hospital, Sichuan University, Chengdu, Sichuan, P. R. China, 610041.

\*Corresponding author: Yanan Tang, yanantang@scu.edu.cn; Feng Li, windtalker\_1205@scu.edu.cn

## Experimental Section

**DNA oligonucleotides.** The DNA oligonucleotides used in this study were purchased from Sangon Biotech Co., Ltd. (Shanghai, China). Fluorophore (FAM-) and quencher (BHQ1 and Biotin-) modified DNA oligonucleotides were purified by Sangon Biotech Co., Ltd. (Shanghai, China) using high-performance liquid chromatography (HPLC). Sequences and modifications of all oligonucleotides are listed in Table S1.

**Buffer conditions.** DNA oligonucleotides were re-suspended by dissolving oligonucleotides using  $1 \times$  tris-EDTA (TE) buffer (10 mM Tris-HCl, pH 8.0, 1 mM EDTA, purchased from Sangon) and then stored at  $-20$  °C. Unless indicated otherwise,  $1 \times$  TE buffer containing 10 mM  $MgCl_2$  and 0.5% (v/v) Tween-20 (Sangon) was used as the reaction buffer. Tween-20 was used to prevent the potential loss of DNA oligonucleotides during dilution and pipetting.

**Probe preparation.** All probes for toehold-mediated DNA strand displacement (TMDS) and toehold-exchange were prepared by mixing equal concentrations of quencher and biotin dual-labeled P strand and FAM-labeled S strand in reaction buffer. The mixture at a final concentration of 10  $\mu$ M was annealed in a Monad thermocycler using an annealing program of heating to 95 °C for 5 min and gradually cooling to room temperature at a constant rate over a period of 1hr. Once prepared, probes were stored in 4 °C until use.

**Fluorescence analysis of TMDS.** For a typical TMDS reaction, a 100  $\mu$ L reaction mixture containing 20 nM triple-labeled probe, varying concentrations of target sequence, and reaction buffer was added to the well of a 96-well microplate. Fluorescence was measured immediately at 37 °C using a BioTek Cytation 5 cell imaging multimode microplate reader with a data acquisition rate of one read per minute for 1 h. The excitation/emission wavelength was set to be 485/525 nm.

**Fabrication of lateral flow strips.** The lateral flow strip was assembled by four components: the sample pad, the conjugate pad, the nitrocellulose membrane (Whatman®, purchased from Sigma Aldrich), and the absorbent pad. The sample pad (17 mm  $\times$  30 cm) was saturated with a buffer containing 0.25% Triton X-100, 0.05 M Tris-HCl, and 0.15 M NaCl.

Anti-FAM modified gold nanoparticles (1.16 nM) with 810  $\mu$ L were loaded to the conjugate pad (8 mm  $\times$  30 cm). Streptavidin (2 mg/mL) was dispensed on the nitrocellulose membrane at the control line (C-line), and the goat anti-rabbit IgG (4 mg/mL) was dispensed at the test line (T-line) using the XYZ platform dispenser HM3030 (Shanghai Kinbio Tech Co., Ltd.). All the membranes and pads were dried at 37  $^{\circ}$ C for 2 h. Finally, the sample pad, conjugate pad, nitrocellulose membrane, and absorption pad were assembled on a plastic adhesive backing (60 mm  $\times$  30 cm). Each part overlaps 2 mm to ensure the solution is migrating through the strip during the assay. Strips with a 3 mm width were cut by using the cutting instrument ZQ2002.

**Lateral flow assay for strand displacement.** To enable lateral flow readout for TMDSD or toehold-exchange reactions, varying concentrations of target sequence were mixed with triple-labeled probe at a final concentration of 30 nM. After incubation at 37  $^{\circ}$ C for 1 hr, 20  $\mu$ L of reaction mixture was loaded to the sample pad of lateral flow strip followed by 30  $\mu$ L 4  $\times$  SSC washing buffer. The colored bands were developed over a period of 10 min and then recorded by the EPSON V500 scanner. The relative band intensities of each of the lateral flow strip were measured using ImageJ software (National Institutes of Health). The relative band intensity was calculated as the ratio of the mean band intensities between T-line and C-line.

**Discrimination of CYP2C19\*2 mutation in buccal swab samples.** All buccal swabs were collected from healthy volunteers. Genomic DNAs in buccal swab samples were extracted by TIANamp Swab DNA Kit (Tiangen Biotech Co., Ltd. (Beijing, China)), strictly following the manufacturer's protocols. Recombinase polymerase amplification (RPA) reactions were performed using a TwistAmp<sup>®</sup> Basic Kit (TwistDX Inc. England). Briefly, the 50  $\mu$ L RPA reaction contained 29.5  $\mu$ L of rehydration buffer, 2.5  $\mu$ L of 10  $\mu$ M forward primer, 2.5  $\mu$ L of 10  $\mu$ M reverse primer, one freeze-dried reaction pellet, 5  $\mu$ L of genomic DNA, 8  $\mu$ L of RNase-free water and 2.5  $\mu$ L of 280 mM magnesium acetate (last added). After a short centrifugation and vortexing, the mixture was incubated at 37  $^{\circ}$ C for 20 min. To convert the double-stranded RPA amplicon into single-stranded sequence, RPA amplicons (15  $\mu$ L) were mixed with 600 nM DNA equalizer probes in reaction buffer in a 0.2 mL PCR tube, adjusting volume to 90  $\mu$ L. The mixture was incubated at 95  $^{\circ}$ C for 5 min and then cooled down to 4  $^{\circ}$ C for 2 min. For fluorescence readout, the mixture was finally mixed with 20 nM CYP-probe in 100  $\mu$ L reaction buffer in a 96-well microplate. Fluorescence was measured immediately using a BioTek Cytation 5 cell

imaging multimode microplate reader with a data acquisition rate of one read per minute for 1 h. The excitation/emission wavelengths were set to be 485/525 nm. For lateral flow readout, the reaction mixture was loaded to the sample pad followed by washing using 30  $\mu$ L of 4  $\times$  SSC buffer. Data visualization and analysis were performed using the above-mentioned protocol.

**Native PAGE Analysis of RPA amplicons.** RPA amplicons were analyzed using 6 % PAGE gel. 5  $\mu$ L of RPA product was mixed with 1  $\mu$ L loading buffer before loading on gel. After electrophoresing in 1 $\times$  TAE buffer at 120 V for 35 min, the gel was stained and visualized using GenoSens 2200.

**Table S1. Sequences of oligonucleotides used in study.**

|                                                                             | Name                        | Sequences (5' → 3')                         | Modification       |
|-----------------------------------------------------------------------------|-----------------------------|---------------------------------------------|--------------------|
| Model target for<br>TMDS                                                    | Target                      | TTCTGTGTAGATTCTTATTATTCATTG                 |                    |
|                                                                             | P                           | TTCTGTGTAGATTCTTATTA                        | 5'-BHQ1, 3'-Biotin |
|                                                                             | S                           | CAATGAATAATAAGAATCTACAACAGGAA               | 3'-FAM             |
| Toehold-exchange<br>for EGFR L858R<br>mutation                              | Correct target (L858R)      | AGTTTGGCCCGCCCAAATCTGTGATCTTG<br>AC         |                    |
|                                                                             | Spurious target (wild-type) | AGTTTGGCCAGCCCAAATCTGTGATCTTG<br>AC         |                    |
|                                                                             | P                           | TACATGTTTGGCCCGCCCAA                        | 5'-BHQ1, 3'-Biotin |
|                                                                             | S                           | ACAGATTTTGGGCGGGCCAAACATGTA                 | 3'-FAM             |
|                                                                             | Spurious target (mut-1)     | AGTTTGGCCCGCCCAAATCTGAGATCTTG<br>AC         |                    |
|                                                                             | Spurious target (mut-5)     | AGTTTGGCCCGCCCAAATCTGTGATCTTG<br>AC         |                    |
|                                                                             | Spurious target (mut-10)    | AGTTTGGCCCGCCAAAATCTGTGATCTTG<br>AC         |                    |
|                                                                             | Spurious target (mut-14)    | AGTTTGGCCAGCCCAAATCTGTGATCTTG<br>AC         |                    |
|                                                                             | Spurious target (mut-18)    | AGTTTAGCCCGCCCAAATCTGTGATCTTG<br>AC         |                    |
|                                                                             | Spurious target (mut-22)    | AATTTGGCCCGCCCAAATCTGTGATCTTG<br>AC         |                    |
| RPA primers for<br>analyzing<br>CYP2C19*2                                   | Forward primer              | TTCTCTTAGATATGCAATAATTTTCCCACT              |                    |
|                                                                             | Reverse primer              | TTTCTCCAAAATATCACTTTCCATAAAAGC<br>AAG       |                    |
| DNA equalizer<br>probes and toe-<br>hold-exchange<br>probe for<br>CYP2C19*2 | DEP1                        | TATTTCCAGGAACCCATAA                         |                    |
|                                                                             | DEP2                        | CAAATTACTTAAAAAC                            |                    |
|                                                                             | DEP3                        | ATCAATGATAGTGGGAAAATTATTGCATAT<br>CTAAGAGAA |                    |
|                                                                             | DEP4                        | TTTCTCCAAAATATCACTTTCCATAAAAGC<br>AAG       |                    |
|                                                                             | CYP2C19*2-S                 | TAATTTGTTATGGGTTCTGGAATGTAG                 | 3'-FAM             |
| CYP2C19*2-P                                                                 | CTACATTCCAGGAACCCATAA       | 5'-BHQ1, 3'-Biotin                          |                    |

**Table S2. Comparison of LFA-based nucleic acid analysis platforms harnessing sandwiched hybridization complexes or strand displacement.**

| Methods        | Type of LFAs | Sensitivity                                        | Specificity to SNV | Comment                                                                                   | Reference |
|----------------|--------------|----------------------------------------------------|--------------------|-------------------------------------------------------------------------------------------|-----------|
| LFNAB          | sandwich     | 60 pM miRNA                                        | Not demonstrated   | Sandwiched hybridization complex is needed to generate LFA signal                         | 1         |
| SD-LAMP        | sandwich     | 110 E.coli cells / $\mu$ L with LAMP amplification | Not demonstrated   | A special design is required to convert strand displacement to sandwiched binding complex | 2         |
| CASLFA         | sandwich     | 150 copies of genomic DNA with PCR amplification   | Not demonstrated   | Cas9 and sgRNA are used to generate a sandwiched binding complex                          | 3         |
| HCR-LFA        | sandwich     | 2 nM DNA with HCR amplification                    | Not demonstrated   | Hybridization chain reaction is used to generate a sandwiched binding complex             | 4         |
| CHA-LFA        | sandwich     | 1 pM miRNA with CHA amplification                  | Yes                | Catalytic hairpin assembly is used to generate a sandwiched binding complex               | 5         |
| SHERLOCK       | DCL          | 2 aM RNA with RPA amplification                    | Yes                | Cas13 and crRNA are used to mediate trans-cleavage of chemically labeled substrates       | 6         |
| TMDS-based DCL | DCL          | 6 nM DNA                                           | Yes                | Direct separation of chemical labels using TMDS                                           | This work |

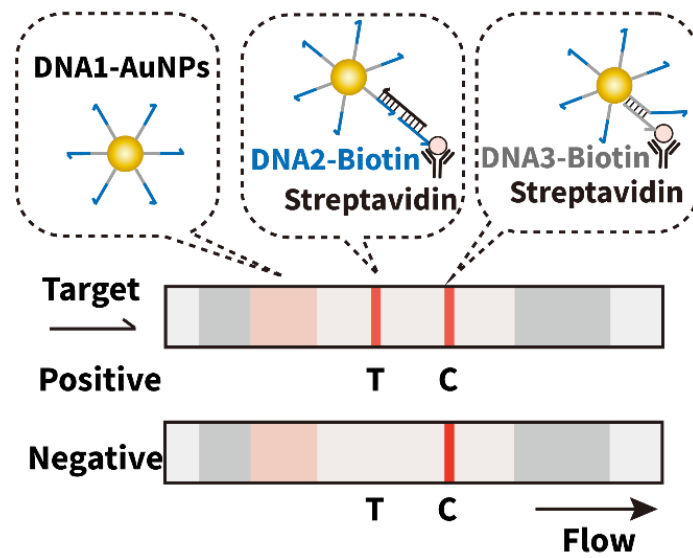

**Figure S1.** Schematic illustration of the classic sandwiched binding-based lateral flow strip for nucleic acid testing.

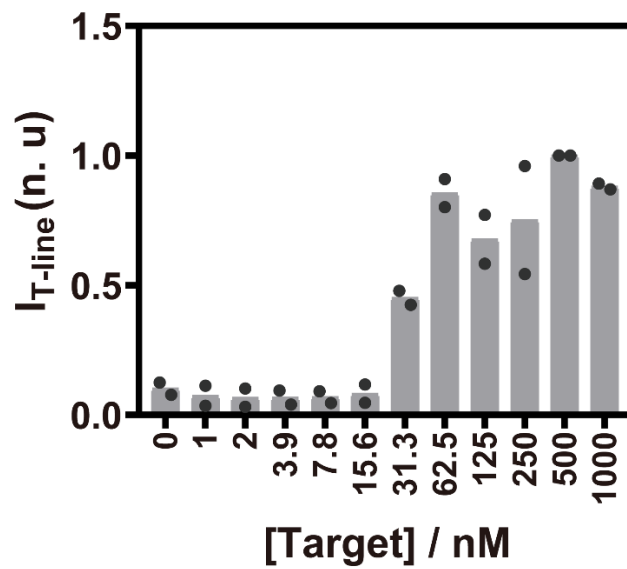

**Figure S2.** Intensities of T-line plotted as a function of target concentrations. Each bar represents the mean of duplicate measurements.

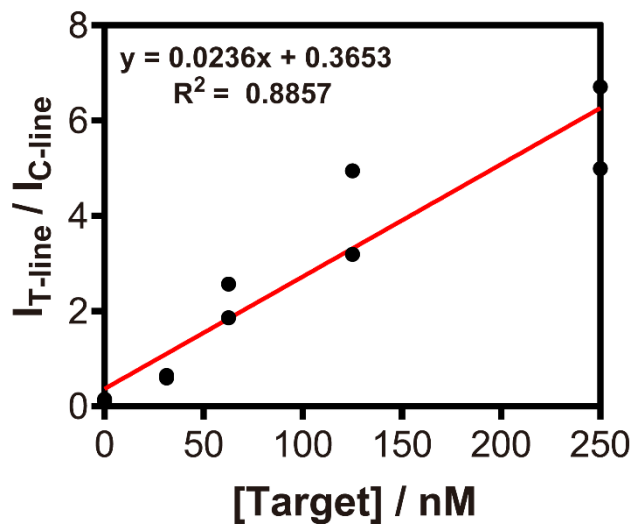

**Figure S3.** Calibration curve of the TMDS reaction using LFA readout.

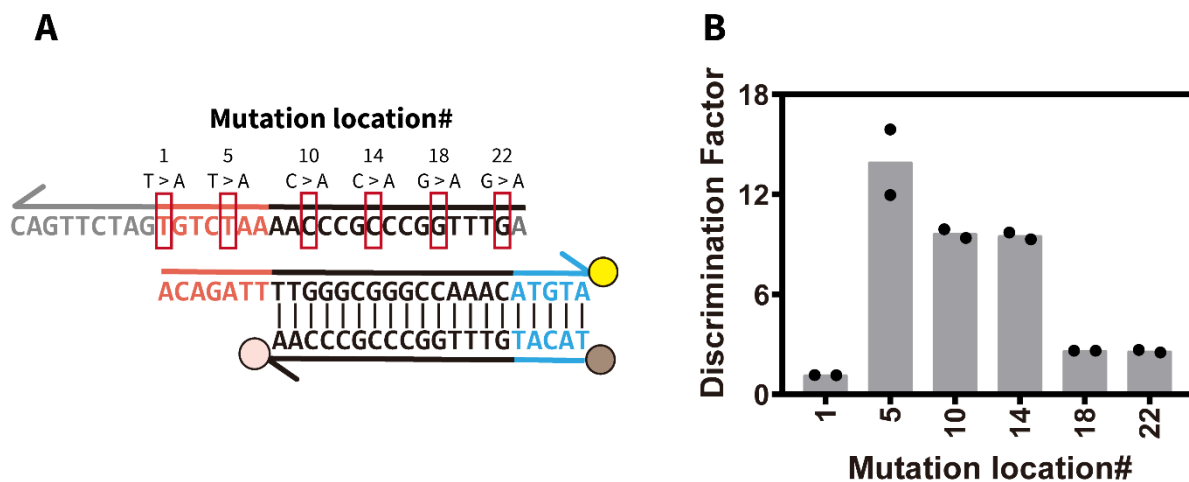

**Figure S4.** (A) Schematic illustration of location and types of mismatches on the target sequences. (B) Discrimination factors for mismatches at varying locations. The concentration of all correct and spurious targets was fixed at 62.5 nM.



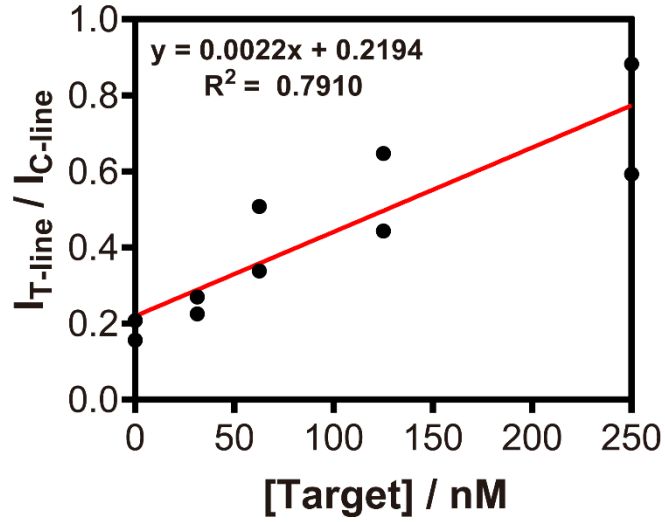

**Figure S5.** Calibration curve of the toehold-exchange reaction using LFA readout.

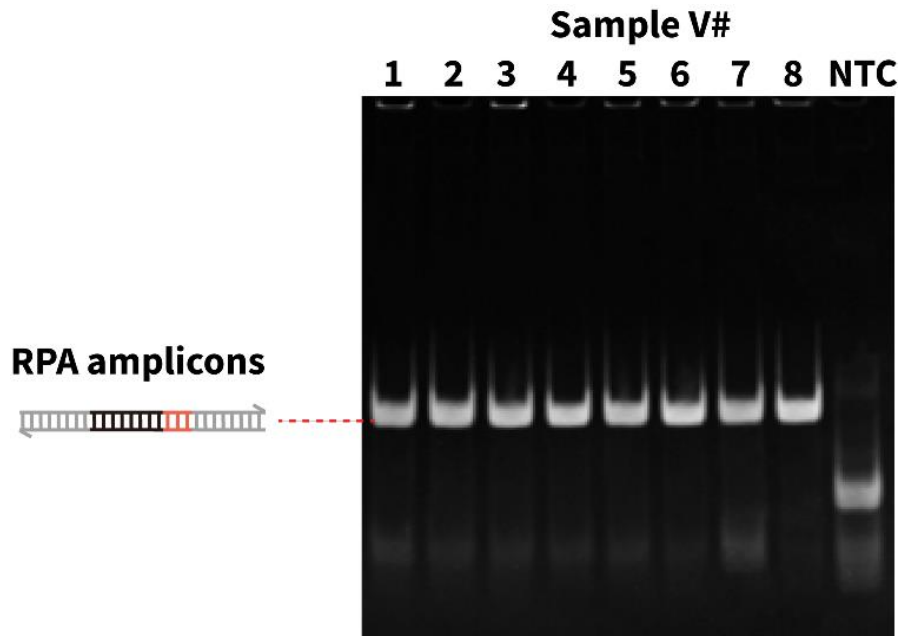

**Figure S6.** Native PAGE Analysis of RPA amplicons. Lane 1 to 8: buccal swab samples 1 to 8; Lane 9: no template control (NTC).

## References

1. X. Gao, H. Xu, M. Baloda, A. S. Gurung, L.-P. Xu, T. Wang, X. Zhang and G. Liu, *Biosens. Bioelectron.*, 2014, **54**, 578–584.
2. E. A. Phillips, T. J. Moehling, S. Bhadra, A. D. Ellington and J. C. Linnes, *Anal. Chem.*, 2018, **90**, 6580–6586.
3. X. Wang, E. Xiong, T. Tian, M. Cheng, W. Lin, H. Wang, G. Zhang, J. Sun and X. Zhou, *ACS Nano*, 2020, **14**, 2497–2508.
4. W. Saisuk, C. Suksamai, C. Srisawat, S. Yoksan and T. Dharakul, *Talanta*, 2022, **248**, 123588.
5. W. Wang, A. Nie, Z. Lu, J. Li, M. Shu and H. Han, *Microchim Acta*, 2019, **186**, 661.
6. J. S. Gootenberg, O. O. Abudayyeh, M. J. Kellner, J. Joung, J. J. Collins and F. Zhang, *Science*, 2018, **360**, 439–444.
